# Supplementary material
Source: HighWire-hosted journal article supplement (https://bmjopengastro.bmj.com/highwire/filestream/3507/field_highwire_adjunct_files/2/bmjgast-2023-001115supp003_data_supplement.pdf)
Supplement: bmjgast-2023-001115supp003_data_supplement.pdf [file bmjgast-2023-001115supp003_data_supplement.pdf]

## Supplemental Materials

Supplemental Table 1. HRQoL outcome measures for induction and maintenance periods by treatment group.

| LSM (SE) unless otherwise specified   | Induction Treatment Groups                                        |                             |                              |                            |
|---------------------------------------|-------------------------------------------------------------------|-----------------------------|------------------------------|----------------------------|
|                                       | PBO IV Q4W (N=63)                                                 | Miri 50 mg EB IV Q4W (N=62) | Miri 200 mg EB IV Q4W (N=61) | Miri 600 mg IV Q4W (N=59)  |
|                                       | <b>Induction Period, Study Week 12</b>                            |                             |                              |                            |
| <b>IBDQ total score</b>               | 148.8 (4.4)                                                       | 159.6 (4.5)                 | 169.3 (4.4)                  | 171.8 (4.5)                |
| Difference vs PBO [95% CI]            |                                                                   | 10.7 (-1.0, 22.5)           | 20.5 ( <b>8.7, 32.2</b> )    | 22.9 ( <b>11.0, 34.9</b> ) |
| <b>IBDQ bowel symptoms score</b>      | 47.3 (1.4)                                                        | 51.8 (1.5)                  | 55.9 (1.4)                   | 53.9 (1.5)                 |
| Difference vs PBO [95% CI]            |                                                                   | 4.4 ( <b>0.7, 8.2</b> )     | 8.6 ( <b>4.8, 12.3</b> )     | 6.6 ( <b>2.8, 10.4</b> )   |
| <b>IBDQ emotional function score</b>  | 56.2 (1.7)                                                        | 58.3 (1.8)                  | 61.9 (1.7)                   | 64.4 (1.8)                 |
| Difference vs PBO [95% CI]            |                                                                   | 2.2 (-2.5, 6.8)             | 5.7 ( <b>1.0, 10.3</b> )     | 8.2 ( <b>3.5, 12.9</b> )   |
| <b>IBDQ social function score</b>     | 24.1 (0.9)                                                        | 26.8 (1.0)                  | 27.5 (0.9)                   | 28.2 (1.0)                 |
| Difference vs PBO [95% CI]            |                                                                   | 2.7 ( <b>0.2, 5.2</b> )     | 3.4 ( <b>0.9, 5.9</b> )      | 4.1 ( <b>1.6, 6.6</b> )    |
| <b>IBDQ systemic symptoms score</b>   | 21.3 (0.7)                                                        | 23.0 (0.7)                  | 24.6 (0.7)                   | 25.5 (0.7)                 |
| Difference vs PBO [95% CI]            |                                                                   | 1.8 (-0.2, 3.7)             | 3.3 ( <b>1.4, 5.2</b> )      | 4.2 ( <b>2.3, 6.2</b> )    |
| <b>SF-36 physical component score</b> | 45.4 (0.8)                                                        | 48.2 (0.9)                  | 48.0 (0.8)                   | 49.0 (0.9)                 |
| Difference vs PBO [95% CI]            |                                                                   | 2.9 ( <b>0.7, 5.0</b> )     | 2.6 ( <b>0.4, 4.8</b> )      | 3.6 ( <b>1.3, 5.8</b> )    |
| <b>SF-36 mental component score</b>   | 42.5 (1.2)                                                        | 43.8 (1.3)                  | 46.1 (1.2)                   | 48.1 (1.3)                 |
| Difference vs PBO [95% CI]            |                                                                   | 1.3 (-1.9, 4.5)             | 3.6 ( <b>0.4, 6.8</b> )      | 5.6 ( <b>2.4, 8.9</b> )    |
|                                       | <b>Maintenance Treatment Groups - Induction Period Responders</b> |                             |                              |                            |
|                                       | Miri 200 mg SC Q4W (N=46)                                         | Miri 200 mg SC Q12W (N=46)  |                              |                            |
|                                       | <b>Maintenance Period, Study Week 52</b>                          |                             |                              |                            |
| <b>IBDQ total score</b>               | 182.5 (4.0)                                                       | 175.5 (4.0)                 |                              |                            |
| <b>IBDQ bowel symptoms score</b>      | 59.6 (1.3)                                                        | 58.0 (1.3)                  |                              |                            |
| <b>IBDQ emotional function score</b>  | 66.1 (1.6)                                                        | 63.4 (1.6)                  |                              |                            |
| <b>IBDQ social function score</b>     | 30.9 (0.9)                                                        | 30.5 (0.9)                  |                              |                            |
| <b>IBDQ systemic symptoms score</b>   | 26.4 (0.7)                                                        | 24.3 (0.8)                  |                              |                            |
| <b>SF-36 PCS</b>                      | 52.0 (1.0)                                                        | 51.3 (1.0)                  |                              |                            |
| <b>SF-36 MCS</b>                      | 47.1 (1.5)                                                        | 46.4 (1.5)                  |                              |                            |

Abbreviations: CI = confidence interval; EB = exposure-based; IBDQ = Inflammatory Bowel Disease Questionnaire; IV = intravenous; LSM = least squares mean; MCS = SF-36 Mental Component Score; miri = mirikizumab; N = number of patients in treatment group; PBO = placebo; PCS = SF-36 Physical Component Score; Q4W = every 4 weeks; Q12W = every 12 weeks; SC = subcutaneous; SE = standard error; SF-36 = Medical Outcomes Study 26-Item Short Form Health Survey Version 2 Standard.

Bolded 95% CIs indicate significant differences vs PBO ( $p < 0.05$ ).

**Supplemental Figure 1. AMAC study design.**

Abbreviations: IV = intravenous; Miri = mirikizumab; N=number of patients in treatment group; PBO = placebo; Q4W = every 4 weeks; Q12W = every 12 weeks; SC = subcutaneous.

**Supplemental Figure 2. Relative proportion of variation between HRQoL measures and clinical efficacy endpoints at Week 12.**

Abbreviations: BU = bowel urgency; EN = endoscopic remission; HRQoL = health-related quality of life; IBDQ = Inflammatory Bowel Disease Questionnaire; MCS = SF-36 Mental Component Score; PCS = SF-36 Physical Component Score; RB = rectal bleeding; SF = stool frequency; SF-36 = Medical Outcomes Study 26-Item Short Form Health Survey Version 2 Standard.

Multivariable linear models were fitted to assess the relative proportion of variation in HRQoL measures at Week 12. Each linear model included the Week 12 Mayo SF score, RB score, endoscopy score, absence of BU status, geographic region, prior biologic experience, age, gender, and baseline value of the HRQoL measure. The coefficient of partial determination, or the partial  $R^2$ , was compared between BU status, SF, RB, and endoscopy scores. mBOCF was used to impute missing Mayo score components and HRQL values.
